# Supplementary material for: FeMoO4nanorod array: a highly active 3D anode for water oxidation under alkaline conditions
Source: Royal Society of Chemistry journal article supplement (doi:10.1039/c7qi00710h), 2018-01-01
Supplement: c7qi00710h1.pdf [file c7qi00710h1.pdf]

## Electronic Supplementary Information

### Experimental section

**Materials:** Ni foam (NF) was provided by Hongshan District, Wuhan Instrument Surgical Instruments business. Iron(II) chloride tetrahydrate ( $\text{FeCl}_2 \cdot 4\text{H}_2\text{O}$ ) was provided by Chengdu Kelon Chemical Reagent Factory. Sodium Molybdate Dihydrate ( $\text{Na}_2\text{MoO}_4 \cdot 2\text{H}_2\text{O}$ ) was purchased from Aladdin Ltd. (Shanghai, China). Ruthenium (III) Chloride Hydrate ( $\text{RuCl}_3 \cdot 3\text{H}_2\text{O}$ ) was purchased from Sigma-Aldrich Chemical Reagent Co., Ltd. The water used throughout all experiments was purified through a Millipore system. All the reagents and chemicals were used as received without further purification.

**Preparation of  $\text{FeMoO}_4/\text{NF}$ :**  $\text{FeMoO}_4/\text{NF}$  was prepared as follows. Prior to the synthesis, the nickel foam was treated by ultrasonication in 3 M HCl solution for 10 min to remove the possible surface oxide layer and cleaned with ethanol and deionized water.  $\text{FeCl}_2 \cdot 4\text{H}_2\text{O}$  (3.6 mmol) and  $\text{Na}_2\text{MoO}_4 \cdot 2\text{H}_2\text{O}$  (3.6 mmol) were dissolved in 45 mL distilled water. After gentle stirring for 15 min, the clear solution was transferred to a 50 mL Teflon-lined stainless steel autoclave. The washed NF substrate ( $3 \times 3$  cm) was immersed into the reaction solution. The autoclave was sealed and maintained at 100 °C for 24 h in an electric oven. After the autoclave cooled down at room temperature, the resulting  $\text{FeMoO}_4$  was taken out and washed with water and ethanol several times, followed by drying at 60 °C for 12 h.

**Synthesis of  $\text{RuO}_2$  and  $\text{FeMoO}_4$  powder/NF:**  $\text{RuO}_2$  was prepared according to previous work.<sup>1</sup> Briefly, 2.61 g  $\text{RuCl}_3 \cdot 3\text{H}_2\text{O}$  was dissolved in 100 mL distilled water and stirred for 10 min at 100 °C. Then, 30 mL NaOH solution (1.0 M) was added to the solution and kept vigorously stirring for 45 min at 100 °C. After that, the above solution was centrifuged for 10 min and filtered. The precipitates were collected and washed with distilled water several times. Finally, the product was dried at 80 °C overnight and then annealed at 350 °C for 1 h in air atmosphere. The as-prepared  $\text{RuO}_2$  powder (0.01 g) was dispersed into a solution of Nafion, ethanol and water with a volume ratio of 10/250/250 via sonication, and deposited onto NF with a loading of

2.46 mg cm<sup>-2</sup>. And the FeMoO<sub>4</sub> powder/NF sample was prepared by similar process.

**Characterizations:** The X-ray diffraction (XRD) patterns were obtained from a LabX XRD-6100 X-ray diffractometer with Cu K $\alpha$  radiation (40 kV, 30 mA) of wavelength 0.154 nm (SHIMADZU, Japan). Scanning electron microscope (SEM) measurements were recorded on a XL30 ESEM FEG scanning electron microscope at an accelerating voltage of 20 kV. Transmission electron microscopy (TEM) images were made on a HITACHI H-8100 electron microscopy (Hitachi, Tokyo, Japan) with an accelerating voltage of 200 kV. X-ray photoelectron spectroscopy (XPS) was conducted on an ESCALABMK II X-ray photoelectron spectrometer using Mg as the exciting source.

**Electrochemical measurements:** Electrochemical measurements were performed with a CHI 660E electrochemical analyzer (CH Instruments, Inc., Shanghai) in a standard three-electrode system. FeMoO<sub>4</sub>/NF was used as the working electrode. A graphite rod and an Hg/HgO were used as the counter electrode and the reference electrode, and KOH used as electrolyte, respectively. The temperature of solution was kept at 25 °C for all the measurements via the adjustment of air condition and heating support, which ensured the variation of diffusion coefficient below 1%. The potentials reported in this work were calibrated to RHE other than especially explained, using the following equation:  $E(\text{RHE}) = E(\text{Hg/HgO}) + (0.098 + 0.059 \text{ pH}) \text{ V}$ .

**Turnover frequency (TOF) calculations:** For TOF calculations, the surface concentration of active sites associated with the redox Fe species should be first calculated. According to the electrochemical CV curves, the oxidation peak current of redox species presents linear change on scan rates. The slope of the line can be calculated using the following equation:

$$\text{Slope} = n^2 F^2 A \Gamma_0 / 4RT$$

Where n is the number of electrons transferred; F is Faraday's constant; A is the surface area of the electrode;  $\Gamma_0$  is the surface concentration of active sites (mol cm<sup>-2</sup>), and R and T are the ideal gas constant and the absolute temperature, respectively.<sup>2</sup>

TOF values can be finally calculated from the formula:

$$\text{TOF} = JA/4Fm$$

Where  $J$  is the current density at a certain overpotential,  $A$  is the area of the electrode, 4 indicates the mole of electrons consumed for evolving one mole of  $O_2$  from water,  $F$  is Faraday's constant and  $m$  is the number of moles of active sites.<sup>3</sup>

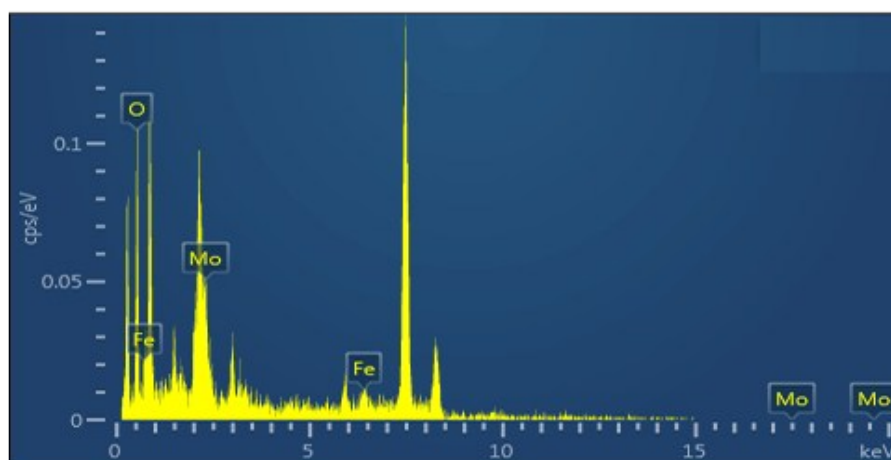

**Fig. S1.** EDX spectrum for FeMoO<sub>4</sub>/NF.

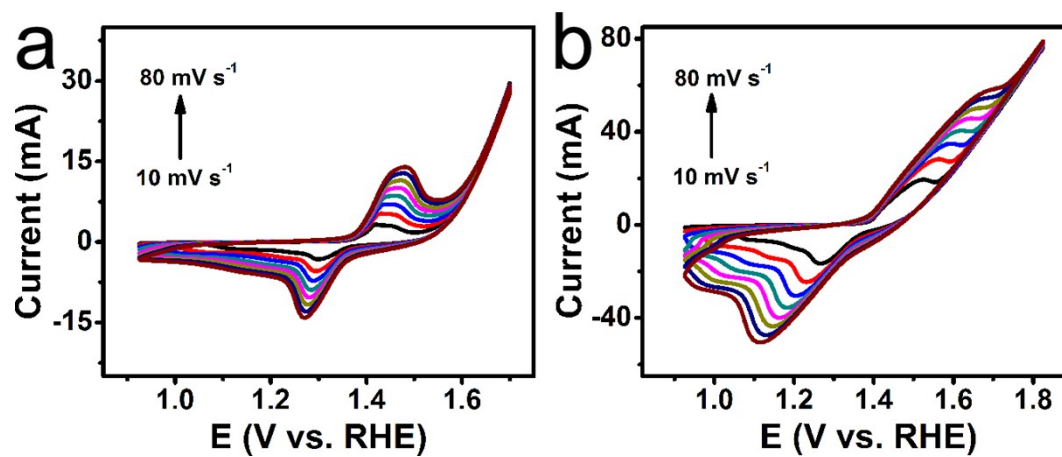

**Fig. S2.** CVs for (a) FeMoO<sub>4</sub> powder/NF and (b) FeMoO<sub>4</sub>/NF in the Faradic capacitance current range at scan rates from 10 to 80 mV s<sup>-1</sup>.

**Table S1.** Comparison of water oxidation performance for FeMoO<sub>4</sub>/NF with other non-noble-metal electrocatalysts in alkaline media.

| Catalyst                                                                          | $j$<br>(mA cm <sup>-2</sup> ) | $\eta$<br>(mV) | Electrolyte | Ref.      |
|-----------------------------------------------------------------------------------|-------------------------------|----------------|-------------|-----------|
| FeMoO <sub>4</sub> /NF                                                            | 50                            | 293            | 1.0 M KOH   | This work |
| CoMoO <sub>4</sub> (0.285)                                                        | 10                            | 312            | 1.0 M KOH   | 4         |
| CoMoO <sub>4</sub> nanorod                                                        | 10                            | 343            | 1.0 M KOH   | 5         |
| Fe-Co <sub>3</sub> O <sub>4</sub> nanocast                                        | 10                            | 486            | 0.1 M KOH   | 6         |
| Ni <sub>30</sub> Fe <sub>7</sub> Co <sub>20</sub> Ce <sub>43</sub> O <sub>x</sub> | 10                            | 410            | 1.0 M NaOH  | 7         |
| $\alpha$ -Fe <sub>2</sub> O <sub>3</sub> NA/CC                                    | 10                            | 420            | 0.1 M KOH   | 8         |
| NiFe-NS                                                                           | 10                            | 300            | 1.0 M KOH   | 9         |
| $\beta$ -NiMoO <sub>4</sub>                                                       | 10                            | 300            | 1.0 M KOH   | 10        |
| NiMoO <sub>4</sub> Nanotubes                                                      | 10                            | 359            | 1.0 M KOH   | 11        |
| CoMoO <sub>4</sub> -NiMoO <sub>4</sub> Nanotubes                                  |                               | 300            |             |           |
| Zn <sub>x</sub> Co <sub>3-x</sub> O <sub>4</sub> nanowire array                   | 10                            | 320            | 1.0 M KOH   | 12        |
| CuCo <sub>2</sub> O <sub>4</sub> /NrGO                                            | 10                            | 360            | 1.0 M KOH   | 13        |
| CoWO <sub>4</sub>                                                                 | 10                            | 388            | 1.0 M KOH   | 14        |

## References

- 1 J. C. Cruz, V. Baglio, S. Siracusano, V. Antonucci, A. S. Aricò, R. Ornelas, L. Ortiz-Frade, G. Osorio-Monreal, S. M. Durón-Torres and L. G. Arriaga, *Int. J. Electrochem. Sci.*, 2011, **6**, 6607–6619.
- 2 S. Pintado, S. Goberna-Ferron, E. C. Escudero-Adan and J. R. Galan-Mascaros, *J. Am. Chem. Soc.*, 2013, **135**, 13270–13273.
- 3 M. Gong, Y. Li, H. Wang, Y. Liang, J. Wu, J. Zhou, J. Wang, T. Regier, F. Wei and H. Dai, *J. Am. Chem. Soc.*, 2013, **135**, 8452–8455.
- 4 M. Yu, L. Jiang and H. Yang, *Chem. Commun.*, 2015, **51**, 14361–14364.
- 5 X. Liu, Y. Yang and S. Guan, *Chem. Phys. Lett.*, 2017, **675**, 11–14.
- 6 T. Grewe, X. Deng and H. Tüysüz, *Chem. Mater.*, 2014, **26**, 3162–3168.
- 7 J. A. Haber, Y. Cai, S. Jung, C. Xiang, S. Mitrovic, J. Jin, A. T. Bell and J. M. Gregoire, *Energy Environ. Sci.*, 2014, **7**, 682–688.
- 8 Q. Liu, A. M. Asiri and X. Sun, *Electrochem. Commun.*, 2014, **49**, 21–24.
- 9 F. Song, X. Hu, *Nat. Commun.*, 2014, **5**, 4477.
- 10 S. Ratha, A. K. Samantara, K. K. Singha, A. S. Gangan, B. Chakraborty, B. K. Jena and C. S. Rout, *ACS Appl. Mater. Interfaces*, 2017, **9**, 9640–9653.
- 11 Z. Yin, Y. Chen, Y. Zhao, C. Li, C. Zhu and X. Zhang, *J. Mater. Chem. A*, 2015, **3**, 22750–22758.
- 12 X. Liu, Z. Chang, L. Luo, T. Xu, X. Lei, J. Liu and X. Sun, *Chem. Mater.*, 2014, **26**, 1889–1895.
- 13 S. K. Bikkarolla and P. Papakonstantinou, *J. Power Sources*, 2015, **281**, 243–251.
- 14 V. K. V. P. Srirapu, A. Kumar, P. Srivastava, R. N. Singh and A. S. K. Sinha, *Electrochim. Acta*, 2016, **209**, 75–84.

15 Seok-Hu  
Bae, Ji-Eun  
Kim,  
Hyacinthe  
Randriama  
hazaka,



Song-Yi

Moon,

16 Jeong-

Young

Park, and

Il-Kwon

Oh

17 Seok-Hu

Bae, Ji-Eun

Kim,

Hyacinthe

Randriama

hazaka,

Song-Yi

Moon,

18 Jeong-

Young

Park, and  
Il-Kwon  
Oh
